# Supplementary material for: Higher premature atrial complex burden from the Holter examination predicts poor cardiovascular outcome
Source: PubMed Central journal article supplement (PMC8190115; doi:10.1038/s41598-021-91800-4), 2021-06-09
Supplement: 41598_2021_91800_MOESM1_ESM.pdf [file 41598_2021_91800_MOESM1_ESM.pdf]

## **Higher premature atrial complex burden from the Holter examination predicts poor cardiovascular outcome**

**Brief title:** PACs increase the risk of mortality

Ting-Chun Huang, M.D. <sup>a,b</sup>, Po-Tseng Lee, M.D. <sup>a,b</sup>, Mu-Shiang Huang, M.D. <sup>b</sup>, Pei-Fang Su, Ph.D. <sup>c</sup>, Ping-Yen Liu, M.D., Ph.D. <sup>a,b,\*</sup>

<sup>a</sup> Institute of Clinical Medicine, College of Medicine, National Cheng Kung University, Tainan, Taiwan

<sup>b</sup> Division of Cardiology, Department of Internal Medicine, National Cheng Kung University Hospital, College of Medicine, National Cheng Kung University, Tainan, Taiwan

<sup>c</sup> Department of Statistics, College of Management, National Cheng Kung University, Tainan, Taiwan

**Supplementary Table S1: Premature atrial complex burdens (presented as ln PAC) in each age bracket and gender**

| <b>Age</b> | <b>Gender</b> | <b>n</b> | <b>Median</b> | <b>Mean</b> | <b>SD</b> | <b>Min</b> | <b>Max</b> | <b>IQR</b> |
|------------|---------------|----------|---------------|-------------|-----------|------------|------------|------------|
| 18~29      | Male          | 639      | 1.39          | 1.62        | 1.58      | 0.00       | 9.91       | 1.50       |
| 18~29      | Female        | 822      | 1.10          | 1.46        | 1.63      | 0.00       | 10.17      | 1.95       |
| 30~39      | Male          | 554      | 1.61          | 1.78        | 1.58      | 0.00       | 9.27       | 1.70       |
| 30~39      | Female        | 836      | 1.39          | 1.64        | 1.66      | 0.00       | 10.39      | 1.39       |
| 40~49      | Male          | 893      | 2.08          | 2.43        | 1.89      | 0.00       | 10.32      | 1.66       |
| 40~49      | Female        | 1217     | 1.79          | 2.10        | 1.78      | 0.00       | 11.67      | 1.67       |
| 50~59      | Male          | 1468     | 2.56          | 2.87        | 1.91      | 0.00       | 10.48      | 1.92       |
| 50~59      | Female        | 1917     | 2.48          | 2.71        | 1.80      | 0.00       | 10.68      | 1.89       |
| 60~69      | Male          | 1632     | 3.26          | 3.59        | 1.98      | 0.00       | 10.85      | 2.00       |
| 60~69      | Female        | 1820     | 3.30          | 3.49        | 1.83      | 0.00       | 10.47      | 2.09       |
| 70~79      | Male          | 1194     | 4.26          | 4.61        | 2.15      | 0.00       | 11.16      | 2.70       |
| 70~79      | Female        | 1366     | 4.32          | 4.57        | 2.00      | 0.00       | 10.63      | 2.44       |
| 80~89      | Male          | 701      | 5.05          | 5.19        | 2.22      | 0.00       | 10.93      | 2.96       |
| 80~89      | Female        | 692      | 4.91          | 5.09        | 2.17      | 0.00       | 11.63      | 2.72       |
| ≥90        | Male          | 77       | 5.90          | 5.75        | 2.52      | 0.00       | 10.24      | 3.46       |
| ≥90        | Female        | 65       | 5.20          | 5.53        | 2.14      | 0.00       | 10.54      | 2.76       |

Abbreviations: Min: minimum, Max: maximum, SD: standard deviation

**Supplementary Table S2: Definitions of terms**

---

| <b>Definitions</b>            |                                                                                                                                                                                                             |
|-------------------------------|-------------------------------------------------------------------------------------------------------------------------------------------------------------------------------------------------------------|
| <b>Hypertension</b>           | Documented in medical records of outpatient department or discharge note and/or concurrent use of calcium channel blockers                                                                                  |
| <b>Diabetes mellitus</b>      | Documented in medical records of outpatient department or discharge note and/or HbA1c $\geq 7.0\%$ and/or concurrent use of anti-diabetic drugs                                                             |
| <b>Hyperlipidemia</b>         | Documented in medical records of outpatient department or discharge note and/or concurrent use of statin and/or abnormal lipid panels (LDL $\geq 160$ , TG $\geq 150$ , total cholesterol $\geq 200$ mg/dL) |
| <b>Chronic kidney disease</b> | Documented in medical records of outpatient department or discharge note and/or eGFR $\leq 60$ mL/min/1.73m <sup>2</sup>                                                                                    |
| <b>Atrial fibrillation</b>    | Documented atrial fibrillation in 12-lead surface electrocardiogram or 24-hour Holter monitor                                                                                                               |

---

Abbreviations: eGFR, estimated glomerular filtration rate; HbA1c, glycated hemoglobin;

LDL; low-density lipoprotein; TG; triglyceride
